# Supplementary material for: Allelic shift in cis-elements of the transcription factor RAP2.12 underlies adaptation associated with humidity in Arabidopsis thaliana
Source: PubMed Central journal article supplement — Sci Adv. 2022 May 4;8(18):eabn8281. doi: 10.1126/sciadv.abn8281 (PMC9067915; doi:10.1126/sciadv.abn8281), 2022-05-04
Supplement: sciadv.abn8281_sm.pdf [file sciadv.abn8281_sm.pdf]

Supplementary Materials for

**Allelic shift in cis-elements of the transcription factor *RAP2.12* underlies adaptation associated with humidity in *Arabidopsis thaliana***

Shangling Lou, Xiang Guo, Lian Liu, Yan Song, Lei Zhang, Yuanzhong Jiang, Lushui Zhang, Pengchuan Sun, Bao Liu, Shaofei Tong, Ningning Chen, Meng Liu, Han Zhang, Ruyun Liang, Xiaoqin Feng, Yudan Zheng, Huanhuan Liu\*, Michael J. Holdsworth\*, Jianquan Liu\*

\*Corresponding author. Email: liuhuanhuan85@163.com (H.L.); michael.holdsworth@nottingham.ac.uk (M.J.H.); liujq@nwipb.cas.cn (J.L.)

Published 4 May 2022, *Sci. Adv.* **8**, eabn8281 (2022)  
DOI: 10.1126/sciadv.abn8281

**The PDF file includes:**

Figs. S1 to S19  
Tables S1 and S4  
Legends for tables S2 and S3  
Legend for data S1

**Other Supplementary Material for this manuscript includes the following:**

Tables S2 and S3  
Data S1

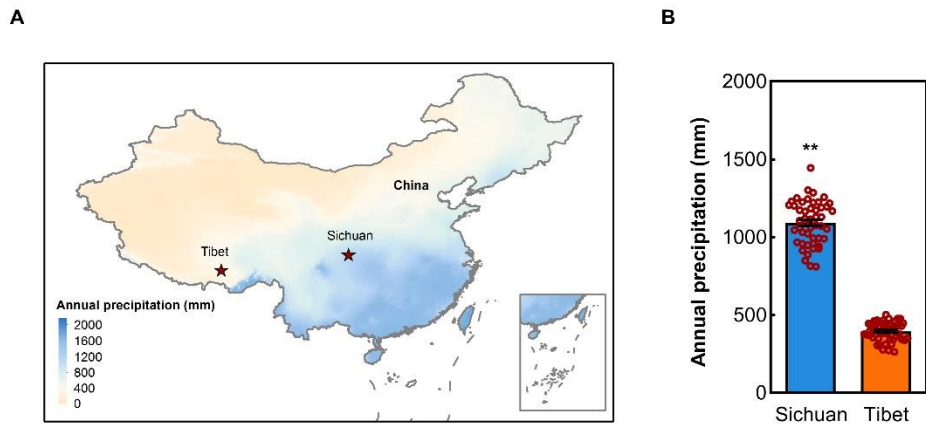

**Fig. S1. Native annual precipitation in the geographical locations where Sichuan and Tibet accessions were collected is significantly different.** (A) Annual precipitation map of Sichuan and Tibet sample sites. (B) Annual precipitation of the sample sites from 1970 to 2018. Data are mean  $\pm$  SE.  $**P < 0.01$ , (two-sided Student's *t*-test).

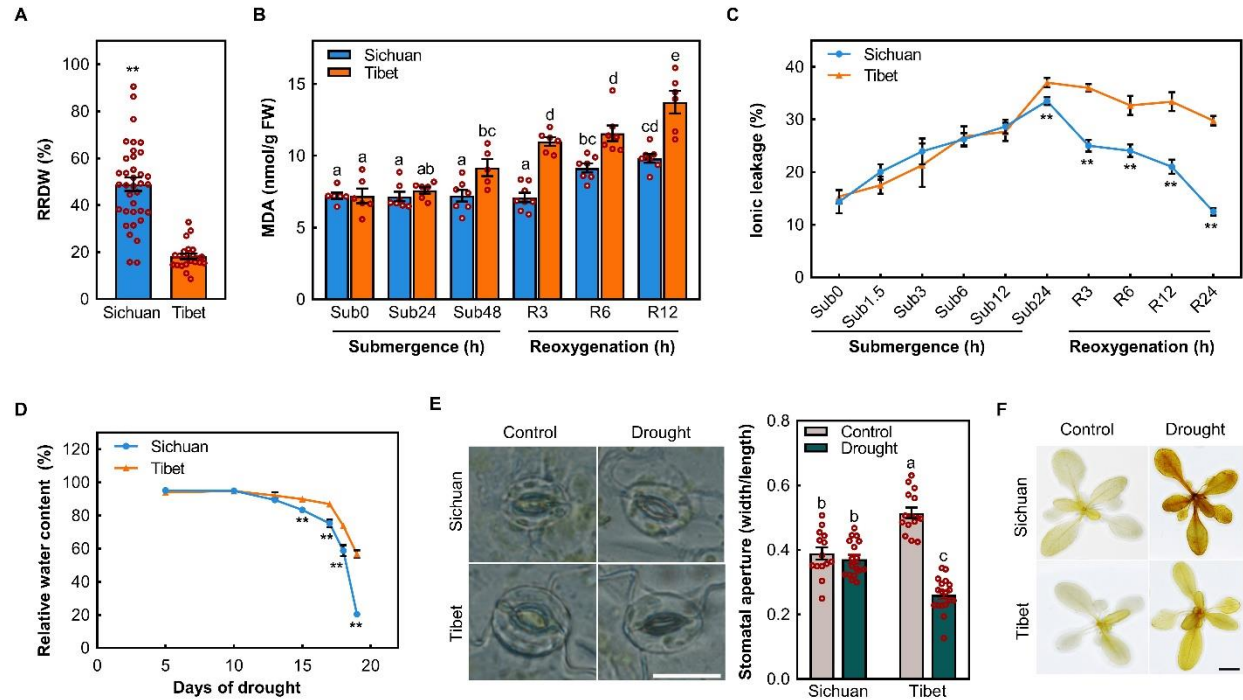

**Fig. S2. Physiological responses of Sichuan and Tibet accessions to submergence and drought stress.** (A) Relative rosette dry weights (RRDW) of surviving individuals in Sichuan and Tibet accessions after 7 days recovery from 64 hours of dark/submergence. Data are mean  $\pm$  SE, ( $n = 23 - 36$ ). (B and C) Malondialdehyde (MDA) (B) and ionic leakage (C) in 18-day-old rosettes of Sichuan and Tibet accessions during submergence and reoxygenation after 48 hours of submergence. Data are mean  $\pm$  SE ( $n = 5 - 8$ ). (D) Relative water content in rosettes of Sichuan and Tibet accessions during application of drought stress. Data are mean  $\pm$  SE ( $n = 3$  repeats). (E) Representative stomatal images and stomatal aperture after stopping watering for 18 days. Scale bars, 20  $\mu$ m. Data are mean  $\pm$  SE ( $n = 14 - 18$ ). (F) Visualization of H<sub>2</sub>O<sub>2</sub> production after 19 days of normal watering or stop watering. Shown are DAB-stained rosettes, and dark brown color indicate H<sub>2</sub>O<sub>2</sub> production. Scale bars, 0.5 cm. Different letters in (B) and (E) denote significant differences according to Tukey's HSD test ( $P < 0.05$ ). \*\* $P < 0.01$  compared with Tibet accession by two-sided Student's  $t$ -test.

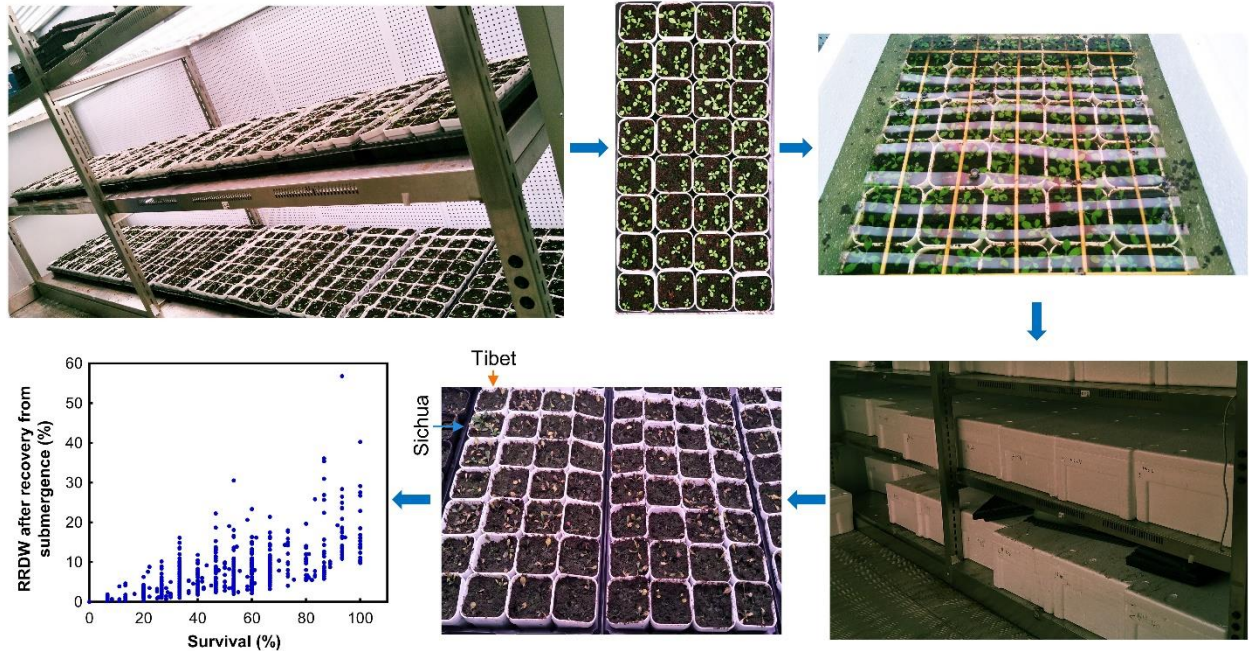

**Fig. S3. Submergence process of recombinant inbred lines.** A total of 623 two-week-old RILs were dark/submerged in tanks for 48, 60, and 72 (shown in this picture) hours, respectively, and followed by 7 days of recovery under normal light conditions. Average survival and RRDW of the three different treatment times have been shown in the lower-left figure.

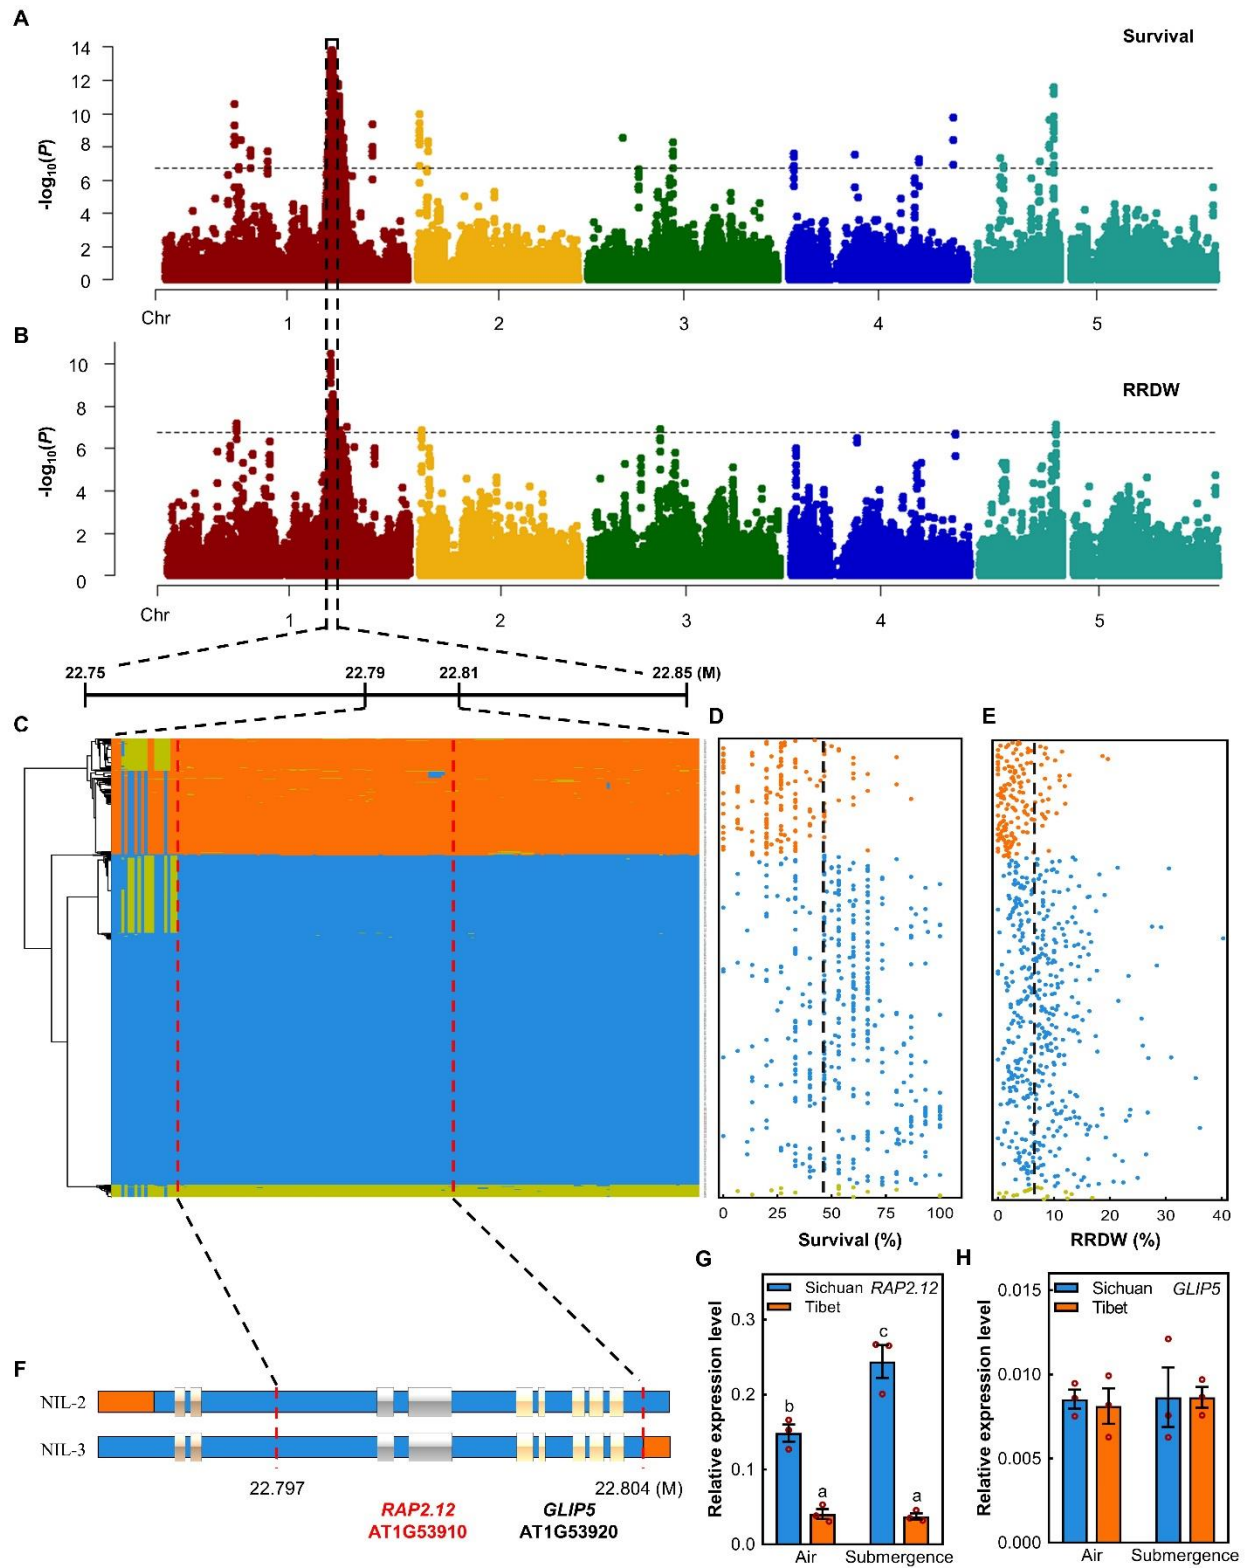

**Fig. S4. GWAS and fine mapping of the major gene that underlies flooding tolerance.** (A and B) Manhattan plots of GWAS for survival (A) and RRDW (B). Different chromosomes are displayed in different colors. The horizontal dash line corresponds to the Bonferroni corrected 5%

significance threshold. Vertical dotted frame indicates the significantly associated locus in both analyses. **(C)** Haplotype analysis that divides 623 RILs into three groups, Sichuan (blue), Tibet (orange), and heterozygous haplotype (green), according to 20k bp sequences around the top peak was found to be significantly associated with both survival and RRDW by GWAS. **(D and E)** Average survival (D) and RRDW (E) correspond to each RIL in D. **(F)** Overlapping genes for fine mapping population (NILs) and haplotype analysis. A ~7 kb interval region containing two genes (the key gene is in red) was identified by whole-genome resequencing of NILs. Blue and orange boxes represent the same nucleotide sequence as Sichuan and Tibet accessions, respectively. Boxes on nucleotide sequences in different colors represent exons. **(G and H)** The relative expression level of two candidate genes, *RAP2.12* (G) and *GLIP5* (H), after air or submergence treatments (20 h) in Sichuan and Tibet accessions. Data are mean  $\pm$  SE relative to the average transcript levels of *ACTIN2* ( $n = 3$ ), see also Figure 3A. Different letters denote significant differences according to Tukey's HSD test ( $P < 0.05$ ).

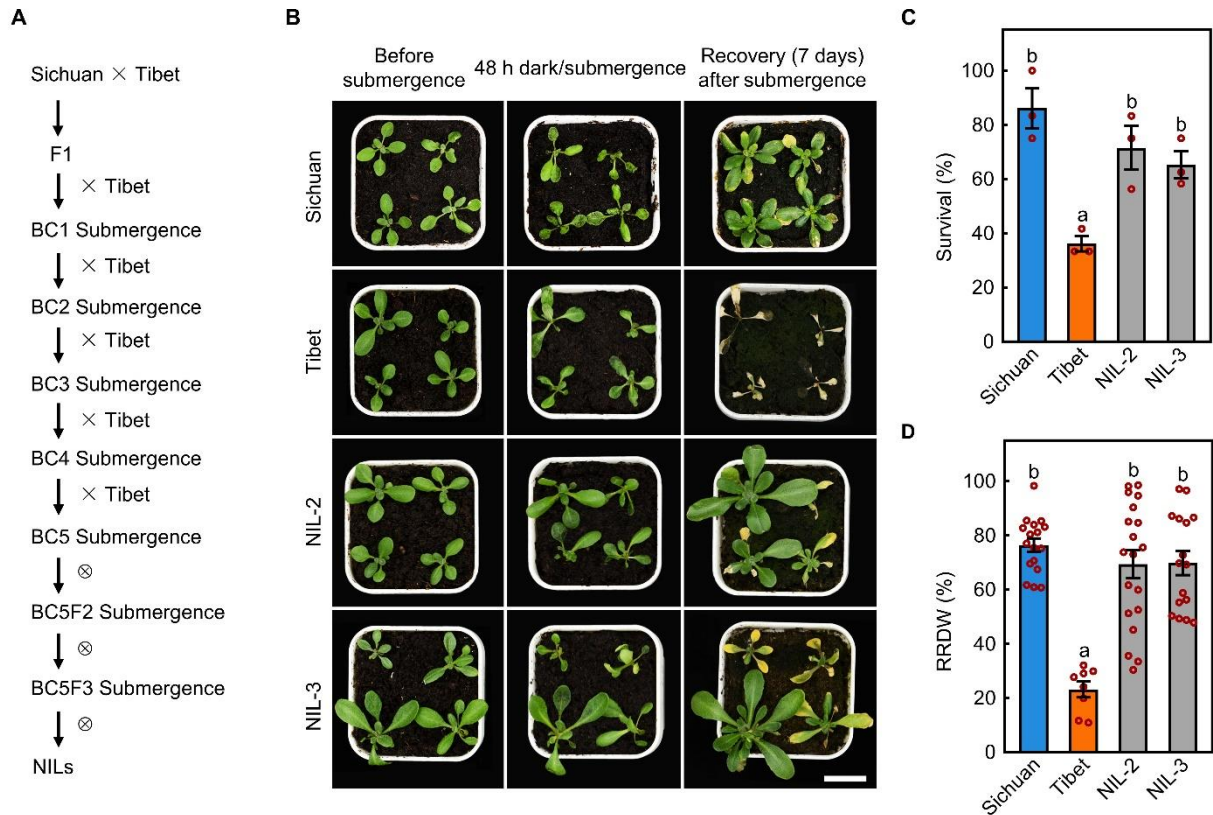

**Fig. S5. The generation procedure of mapping population and its representative phenotype.** (A) F1 generation of Sichuan and Tibet accessions was backcrossed to Tibet accession for 5 rounds, and then self-bred for three generations. Each generation was submerged for 48 hours and the survival individuals were selected out for backcrossing or self-breeding. The submergence-resistant lines were sequenced and the sequenced data were used to overlap with the results of RILs haplotype analysis. These lines with a ~7 kb overlapping interval containing Sic-RAP2.12 but Tibet accession for the rest of the genome were named NILs. (B) Phenotypic comparison of submergence tolerance among Sichuan accession, Tibet accession and NILs. Seedlings after 48 h of dark/submergence and 7 days recovery. Scale bar, 2 cm. (C and D) Survival (C) ( $n = 3$  repeats) and RRDW of survival individuals (D) in (B) ( $n = 8 - 19$ ). Different letters in (C) and (D) denote significant differences according to Tukey's HSD test ( $P < 0.05$ ).

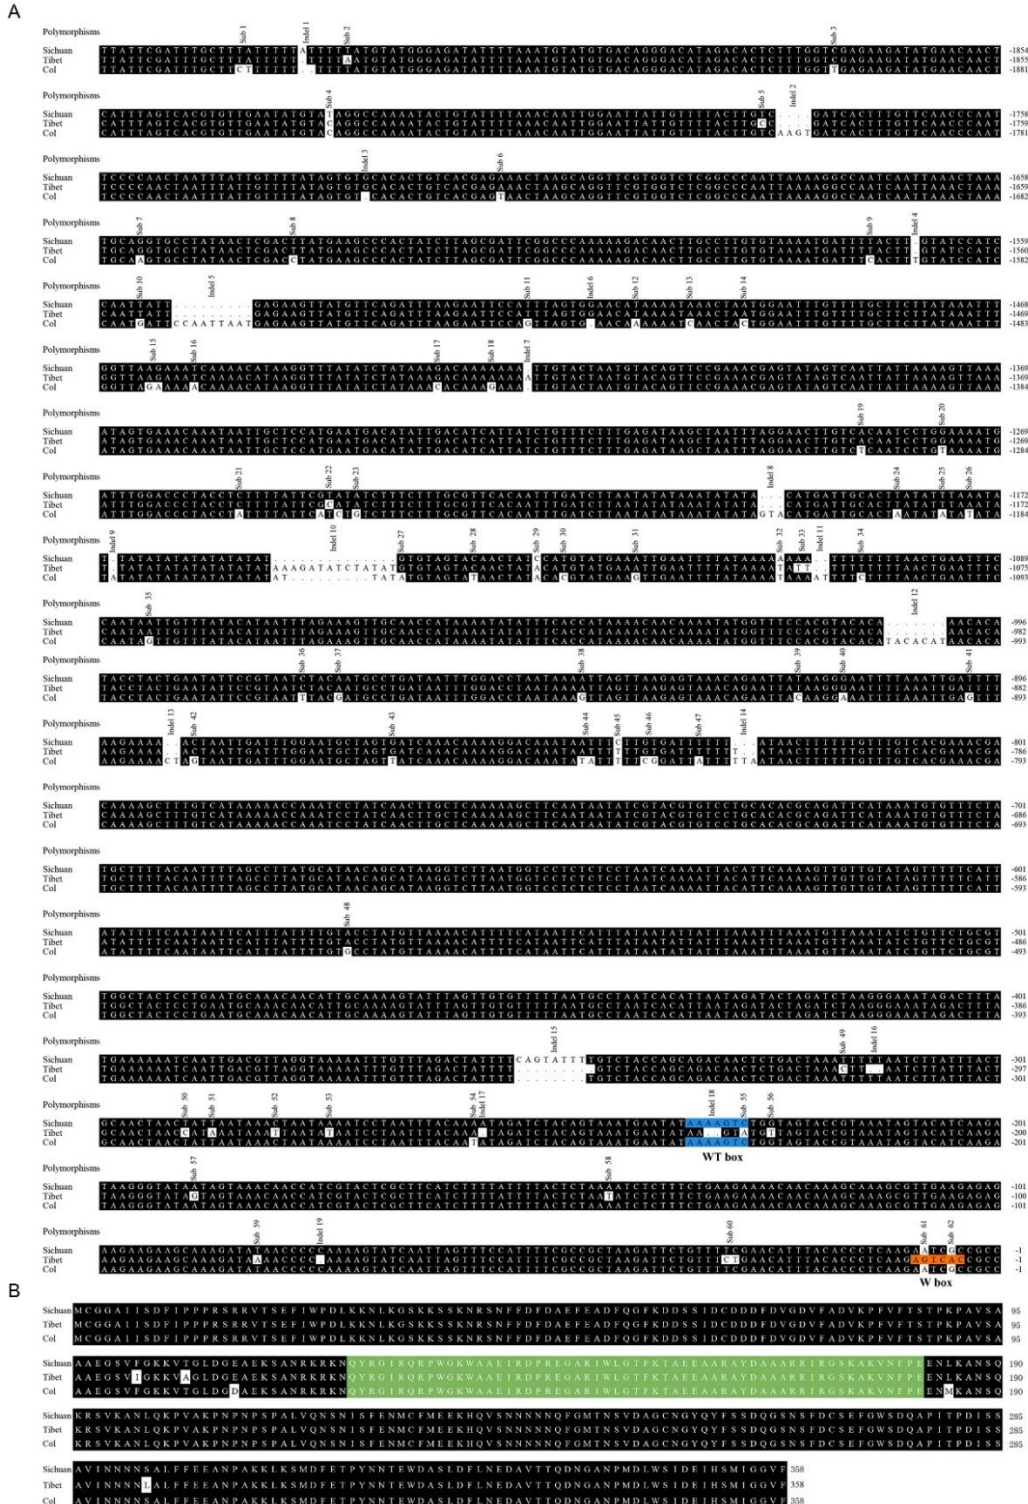

**Fig. S6. *RAP2.12* promoter and amino acid mutations among Tibet, Sichuan and Col accessions. (A) Sequences of *RAP 2.12* promoter in the alignment. Core *cis*-element sequences of WT box and W box are in blue and orange respectively. (B) *RAP2.12* amino acid sequence in the alignment. Sequences of the functional domain (AP2 domain) are in green. The position number on the right is from ATG of each accession.**





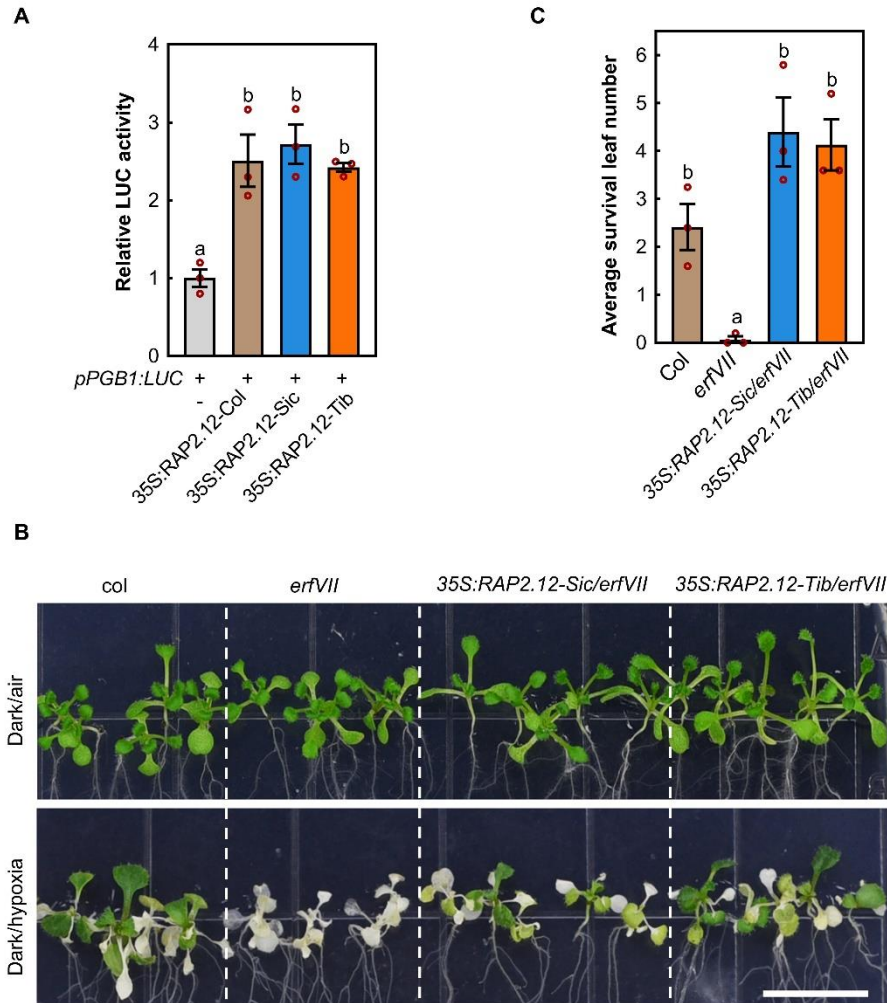

**Fig. S8. The protein of RAP2.12-Sic and RAP2.12-Tib activated *PGB1* well, and rescue *erfVII*.** (A) Transactivation of *PGB1* promoter by RAP2.12 from Col, Sichuan and Tibet accessions. The differences of RAP2.12 among the three accessions are shown in Figure S5. (B and C) The phenotype (B) and average survival leaf number (C) of 18-day-old *35S:RAP2.12-Sic* and *35S:RAP2.12-Tib* under *erfVII* mutant background of Col after treatment with dark/air or dark/hypoxia and followed by 3 days recovery. Data are mean  $\pm$  SE ( $n = 3$  repeats). Different letters denote significant differences according to Tukey's HSD test ( $P < 0.05$ ).

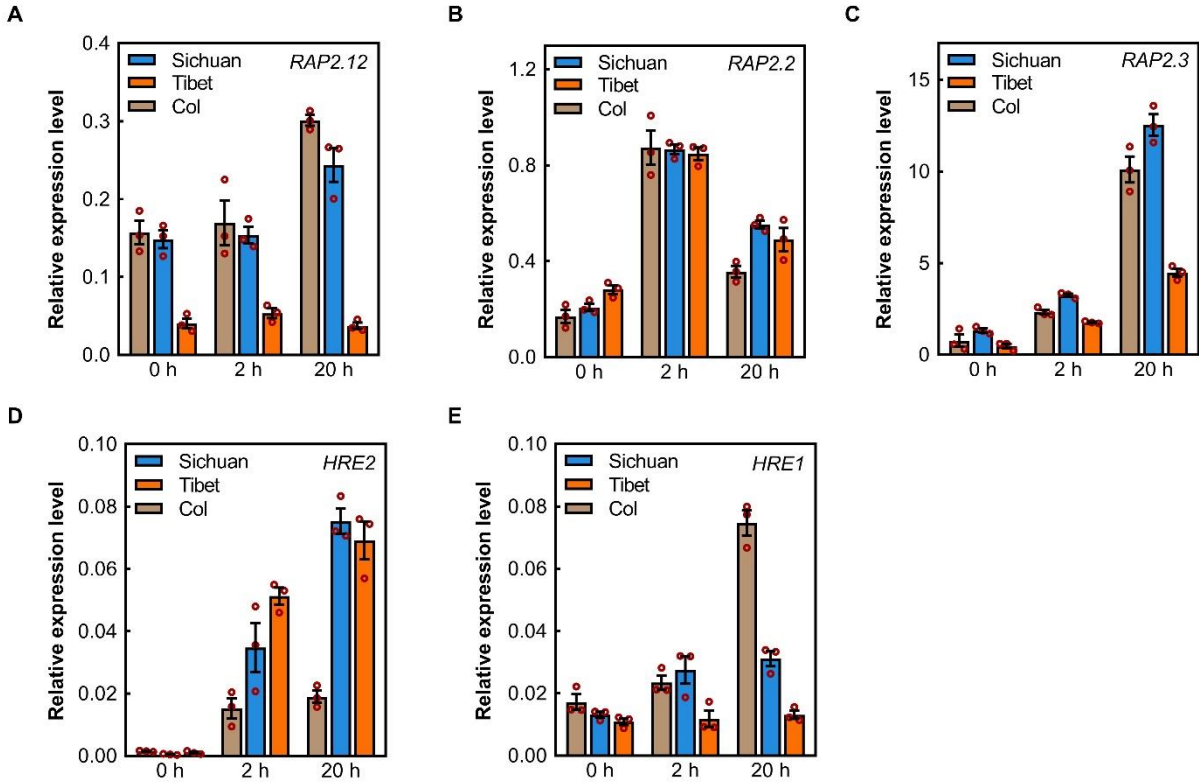

**Fig. S9. The expression level of *ERFVII* in response to submergence treatment in Sichuan, Tibet, and Col accessions.** Relative mRNA transcript abundance of 18-days old seedlings under different submergence treatment times as indicated. *RAP2.2*, *RAP2.3* and *HRE2* showed positive regulation in three accessions, but the *RAP2.12* and *HRE1* in Tibet lost their response to submergence. Data are mean  $\pm$  SE relative to the average transcript levels of *ACTIN2* ( $n = 3$  biologically independent samples).

**A**

At1g53910.242197\_at. ERFVII

Arabidopsis eFP Browser at bar.utoronto.ca  
Winter et al., 2007. PLoS One 2(8): e718

Natural Variation eFP Browser. Data from the Weigel Lab (Lempe et al., 2005, PLoS Genetics 1:e6). Aerial parts of 4 day old seedlings greenhouse-grown in soil at 23C under continuous light were sampled. Data normalized by the GCOS method, TGT value of 100. Plant material sampled in triplicate where indicated by italics, otherwise once.

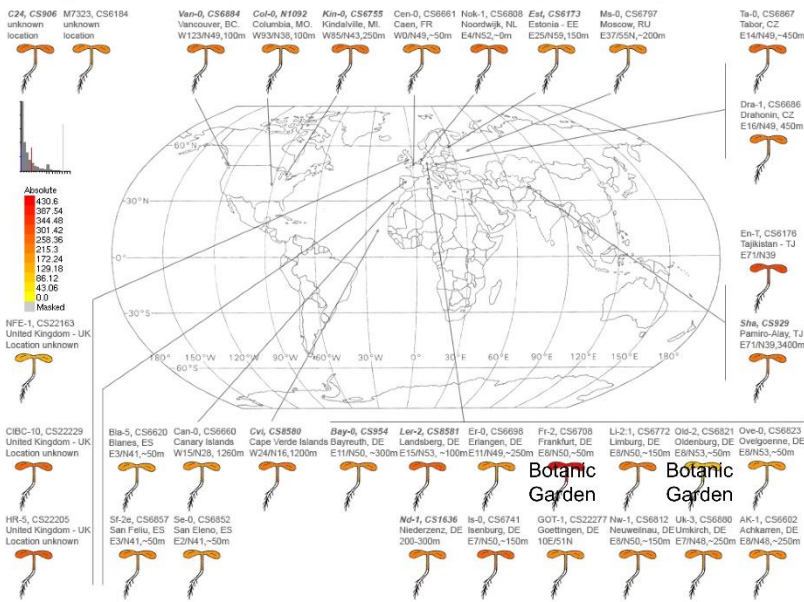

**B**

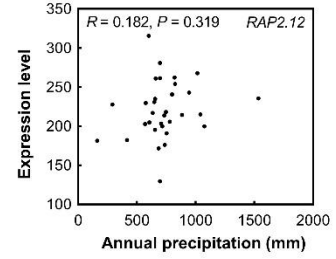

**C**

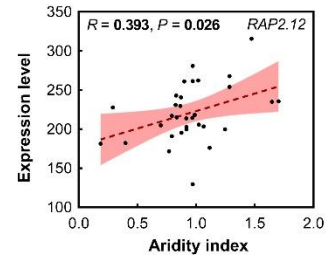

**D**

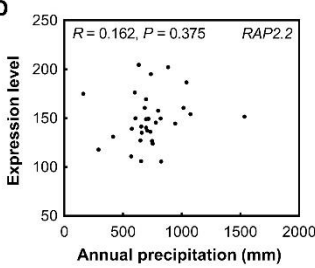

**E**

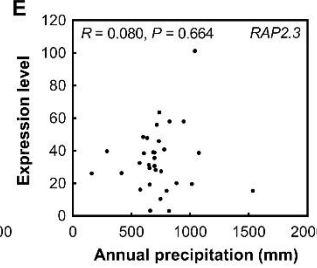

**F**

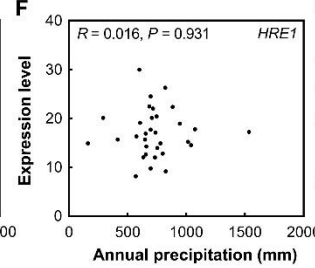

**G**

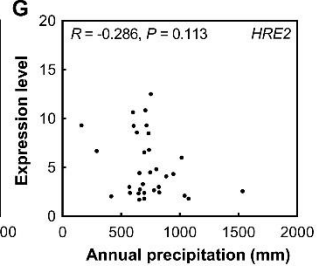

**H**

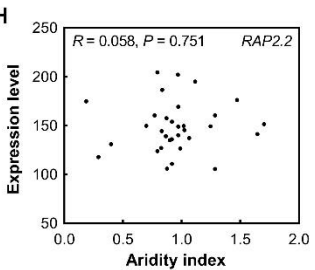

**I**

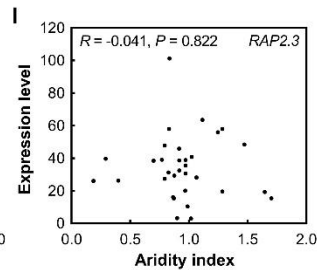

**J**

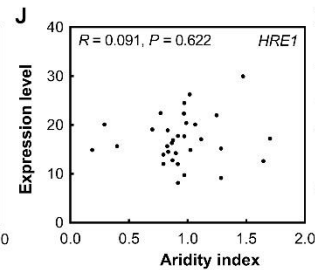

**K**

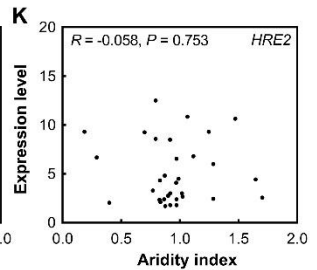

**Fig. S10. The expression of *RAP2.12* increases with the increase of humidity.** (A) Global expression pattern of *RAP2.12* in 34 *Arabidopsis* accessions from public database visualized by the *Arabidopsis* eFP browser (19) (<http://bar.utoronto.ca/efp/cgi-bin/efpWeb.cgi>). Fr-2 and Old-2 from the botanic garden are marked on the seedlings. (B - K) Correlation between *ERFVII* expression and precipitation and aridity index. Absolute expression levels are from the *Arabidopsis* eFP browser. The red dash line shows a linear fit, and the light red shadow indicates the 95% confidence interval of the regression. The correlation coefficients and *P* values are calculated using Pearson's correlation analysis.

**A**

```

Sichuan MDTNKAKKLLKVMNQLVEGHDLTTQLQQLLSQPGSGLEDLVAKILVCFNNTISVLDTFEPI 60
Tibet MDTNKAKKLLKVMNQLVEGHDLTTQLQQLLSQPGSGLEDLVAKILVCFNNTISVLDTFEPI 60
Col MDTNKAKKLLKVMNQLVEGHDLTTQLQQLLSQPGSGLEDLVAKILVCFNNTISVLDTFEPI 60

Sichuan SSSSSLAAVEGSQLNASCNDNGKFEDSGDSRKRRLGPVKGRGCYKRRKRSETCTIESTILE 120
Tibet SSSSSLAAVEGSQLNASCNDNGKFEDSGDSRKRRLGPVKGRGCYKRRKRSETCTIESTILE 120
Col SSSSSLAAVEGSQLNASCNDNGKFEDSGDSRKRRLGPVKGRGCYKRRKRSETCTIESTILE 120

Sichuan DAFSWRKYGQKEILNAKFPRS YFRCTHKYTOGCKATKQVQKVELEPKMFSITYIGNHTCN 180
Tibet DAFSWRKYGQKEILNAKFPRS YFRCTHKYTOGCKATKQVQKVELEPKMFSITYIGNHTCN 180
Col DAFSWRKYGQKEILNAKFPRS YFRCTHKYTOGCKATKQVQKVELEPKMFSITYIGNHTCN 180

Sichuan TNAETPKSKTCDHHDEIFMDS EDHKS PSLTTSMK EEDNPHRHHGSS TENDLSLVWPEMV 240
Tibet TNAETPKSKTCDHHDEIFMDS EDHKS PSLTTSMK EEDNPHRHHGSS TENDLSLVWPEMV 240
Col TNAETPKSKTCDHHDEIFMDS EDHKS PSLTTSMK EEDNPHRHHGSS TENDLSLVWPEMV 239

Sichuan FEEDYHHQASYVSGKTSTSIDVLGSQDLMVFGGGDFEFSENEHFSIFSSCSNLS 295
Tibet FEEDYHHQASYVNGKTSTSIDVLGSQDLMVFGGGDFEFSENEHFSIFSSCSNLS 295
Col FEEDYHHQASYVNGKTSTSIDVLGSQDLMVFGGGDFEFSENEHFSIFSSCSNLS 294

```

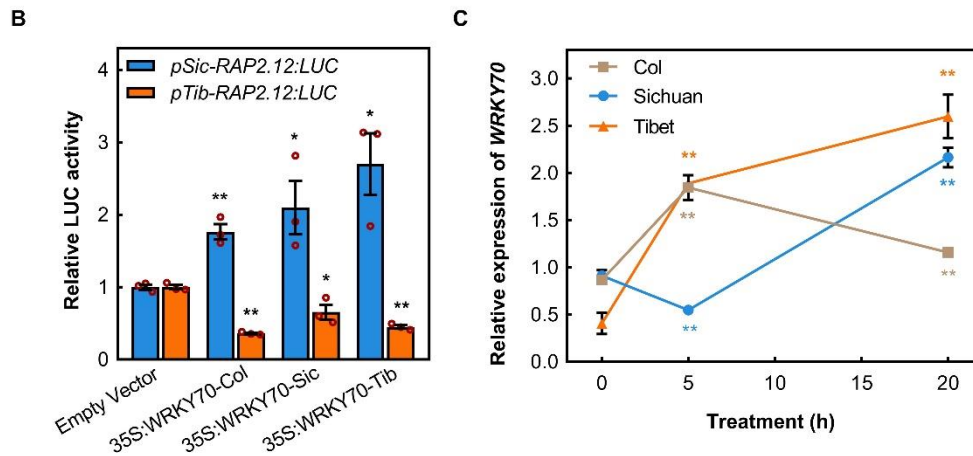

**Fig. S11. WRKY70 involves submergence-induced hypoxia by directly activating the expression of *RAP2.12*.** (A) WRKY70 amino acid sequence in the alignment. (B) Three types of WRKY70 protein transactivate *pSic-RAP2.12* promoter and repress *pTib-RAP2.12* promoter. Data are mean  $\pm$  SE. (C) The relative expression level of *WRKY70* in Col, Sichuan and Tibet accessions, after air or submergence treatments for the indicated time. Data are mean  $\pm$  SE relative to the average transcript levels of *ACTIN2*.  $n = 3$ , \* $P < 0.05$ ; \*\* $P < 0.01$ , compared with empty vector (B) or air treatments (0 h) (C) by two-sided Student's *t*-test.

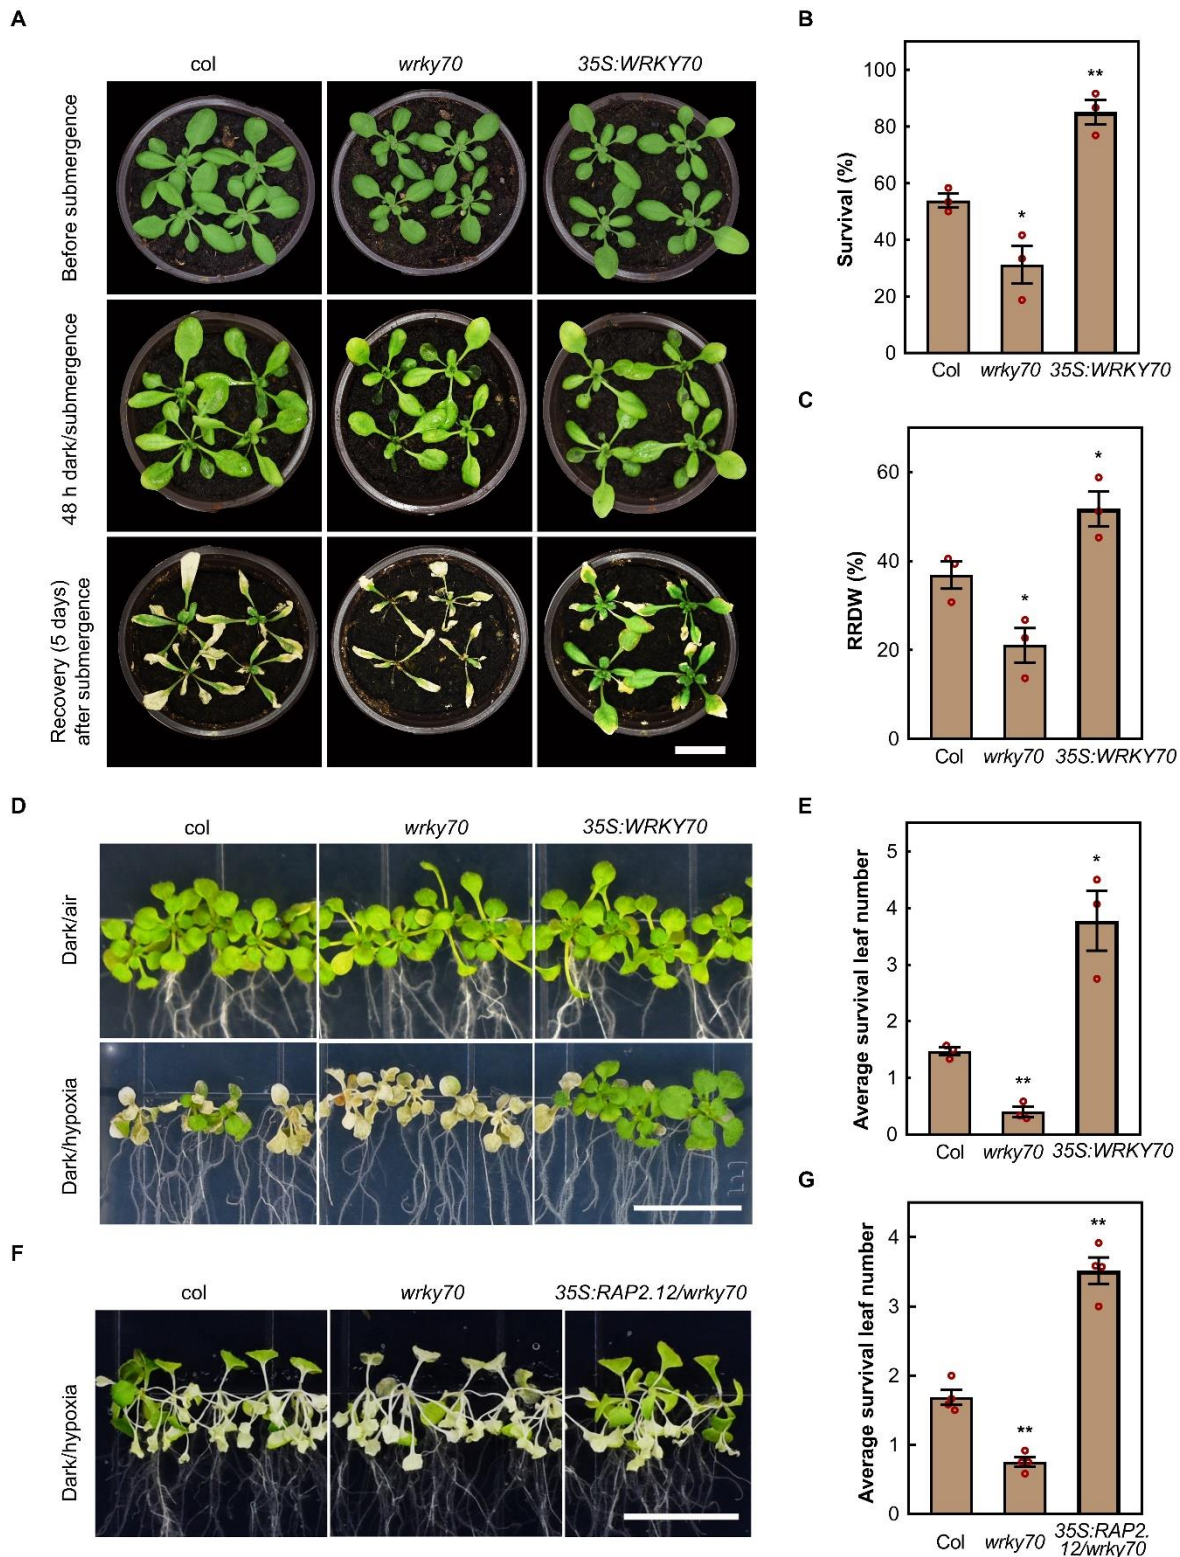

**Fig. S12. WRKY70 acts upstream of *RAP2.12* in controlling submergence-induced hypoxic stress.** (A) Wild-type (Col), *wrky70* mutant, and 35S:WRKY70 plants after dark submergence treatment for 48 h, followed by 5 days recovery. (B and C) Survival (B), and RRDW (C) of survival individuals in (A). (D) Phenotype of Wild-type (Col), *wrky70* mutant, and 35S:WRKY70

plants after treatment with dark/air or dark/hypoxia (5% (v/v) oxygen for 24 h and lower than 0.01% for 16 h), followed by 3 days recovery. (E) Average survival Leaf number in (D). (F) Overexpression of RAP2.12 (*35S:RAP2.12*) under *wrky70* mutant background of Col-0 restored the hypoxic resistance with the same treatment in (D). (G) Average survival leaf number in (D). Data are mean  $\pm$  SE ( $n = 3$  for 12 individuals in (B) and (C) and 10 individuals in (E) and (G)). Scale bars, 2 cm in (A), and 1 cm in (D) and (F). \* $P < 0.05$ ; \*\* $P < 0.01$ , compared with Col by two-sided Student's *t*-test.

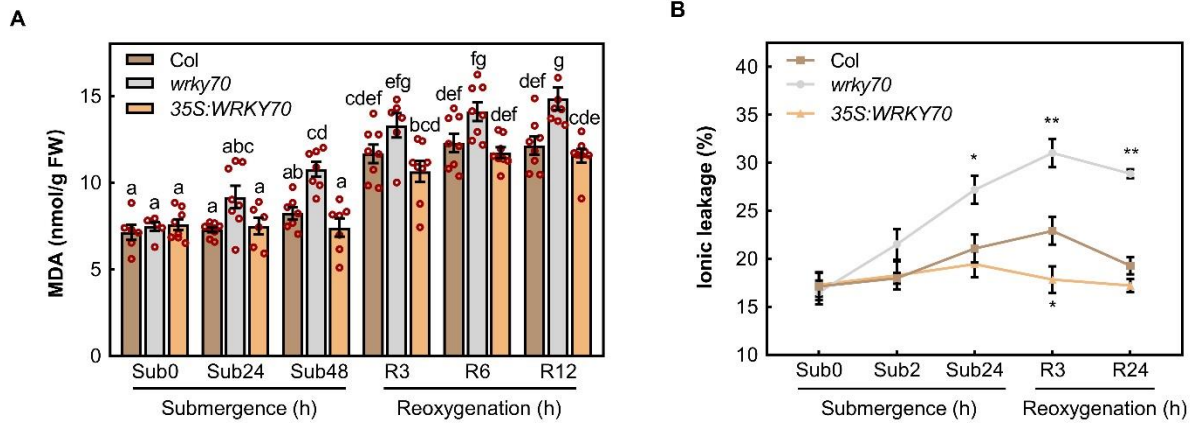

**Fig. S13. Analyses of MDA and electrolyte leakage in *Col*, *wrky70*, and *35S:WRKY70* during submergence and reoxygenation.** (A) MDA response during submergence and reoxygenation after 48 hours of submergence in 18-day-old rosettes. Data are mean  $\pm$  SE ( $n = 6 - 8$ ). Different letters denote significant differences according to Tukey's HSD test ( $P < 0.05$ ). (B) Ionic leakage during submergence and reoxygenation after 24 hours of submergence in 18-day-old rosettes. Data are mean  $\pm$  SE ( $n = 4$ ). \* $P < 0.01$ ; \*\* $P < 0.01$ , compared with wild type (*Col*) by two-sided Student's *t*-test.



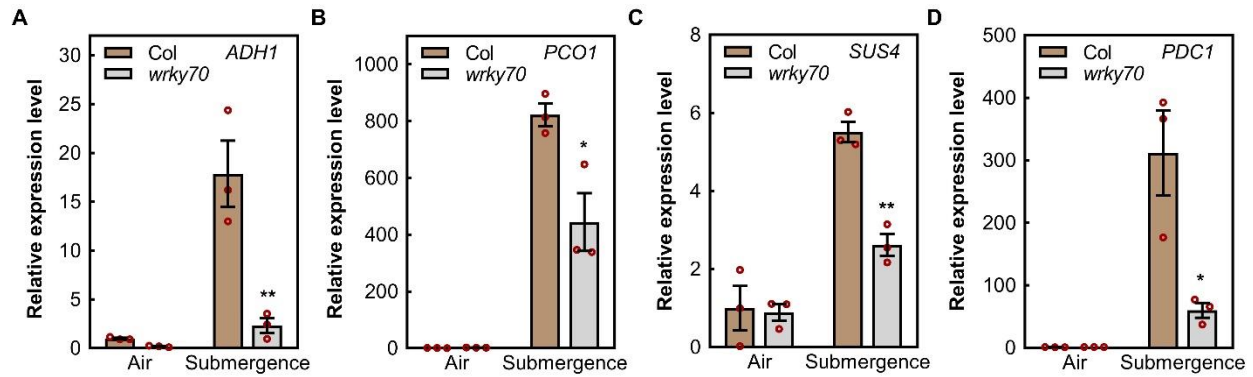

**Fig. S14. Relative expression levels of hypoxia-responsive marker genes in response to submergence.** Relative mRNA transcript abundance of four randomly selected marker genes (*ADH1*, *PCO1*, *SUS4* and *PDC1*) under air or 2 hours of submergence treatments using 18-days old shoots. Data were normalized to air treatments and are mean  $\pm$  SE;  $n = 3$  biologically independent samples. \* $P < 0.05$ ; \*\* $P < 0.01$ , compared with wild type (Col) by two-sided Student's *t*-test.

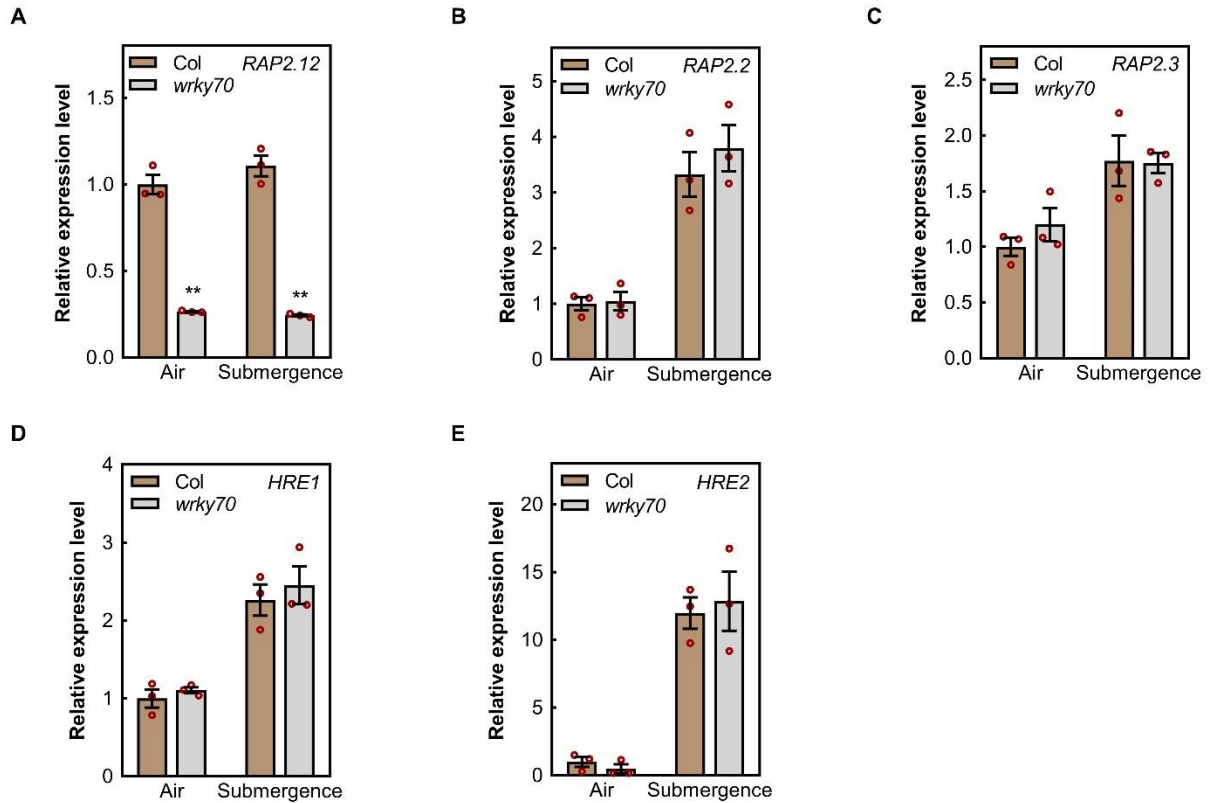

**Fig. S15. Relative expression levels of *ERFVII* members in response to submergence in Col and *wrky70* mutant.** Relative mRNA transcript abundance of *ERFVII* under air or 2 hours of submergence treatments using 18-days old shoots. Data were normalized to air treatments and are mean  $\pm$  SE;  $n = 3$  biologically independent samples. \*\* $P < 0.01$ , compared with wild type (Col) by two-sided Student's  $t$ -test.

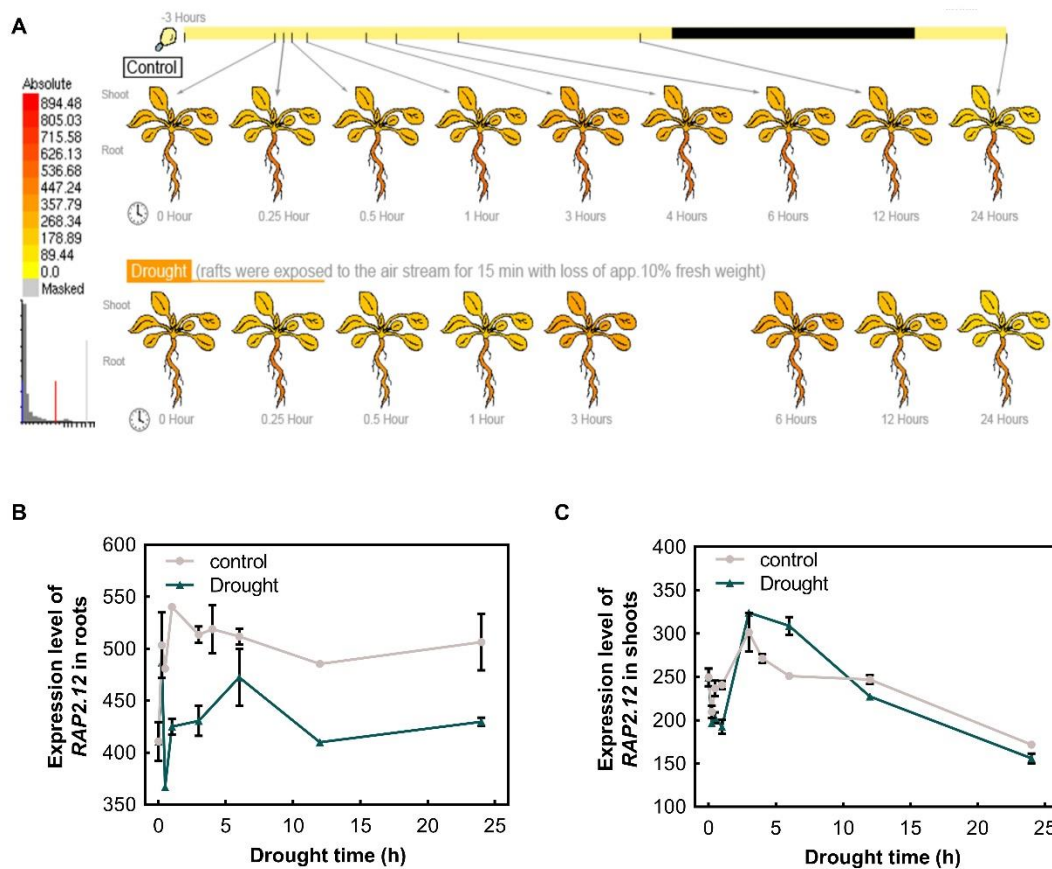

**Fig. S16. Drought response pattern of *RAP2.12* expression in Col accession.** (A) Drought treatment-dependent expression pattern of *RAP2.12* in Col from public database visualized by the *Arabidopsis* eFP browser (19) (<http://bar.utoronto.ca/efp/cgi-bin/efpWeb.cgi>). (B and C) The absolute expression level of *RAP2.12* in roots (B) and shoots (C) respond to drought treatment in (A). Data are obtained from the *Arabidopsis* eFP browser.

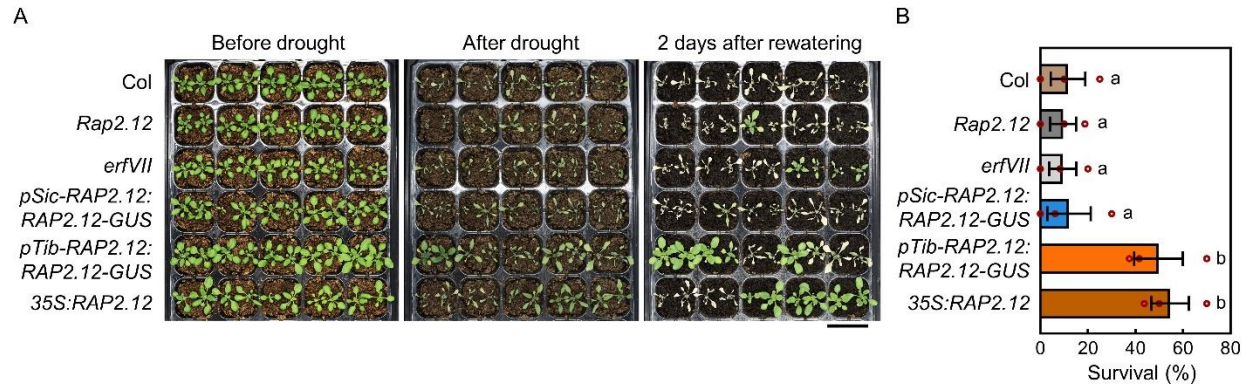

**Fig. S17. *RAP2.12* promoter in Tibet accession with W box *cis*-element promotes drought resistance.** (A) Comparison of drought resistance among Col-0, *rap2.12*, *erfVII*, *pSic-RAP2.12:RAP2.12-GUS*, *pTib-RAP2.12:RAP2.12-GUS* and *35S:RAP2.12* (all in Col-0 background). Phenotypes after stopping watering for 10 days (Before drought), 14 days (After drought), and 2 days after rewatering. Scale bar, 5 cm. (B) Survival of drought treatments in (B). Data are mean  $\pm$  SE ( $n = 3$  for 10 - 16 individuals). Different letters denote significant differences according to Tukey's HSD test ( $P < 0.05$ ).

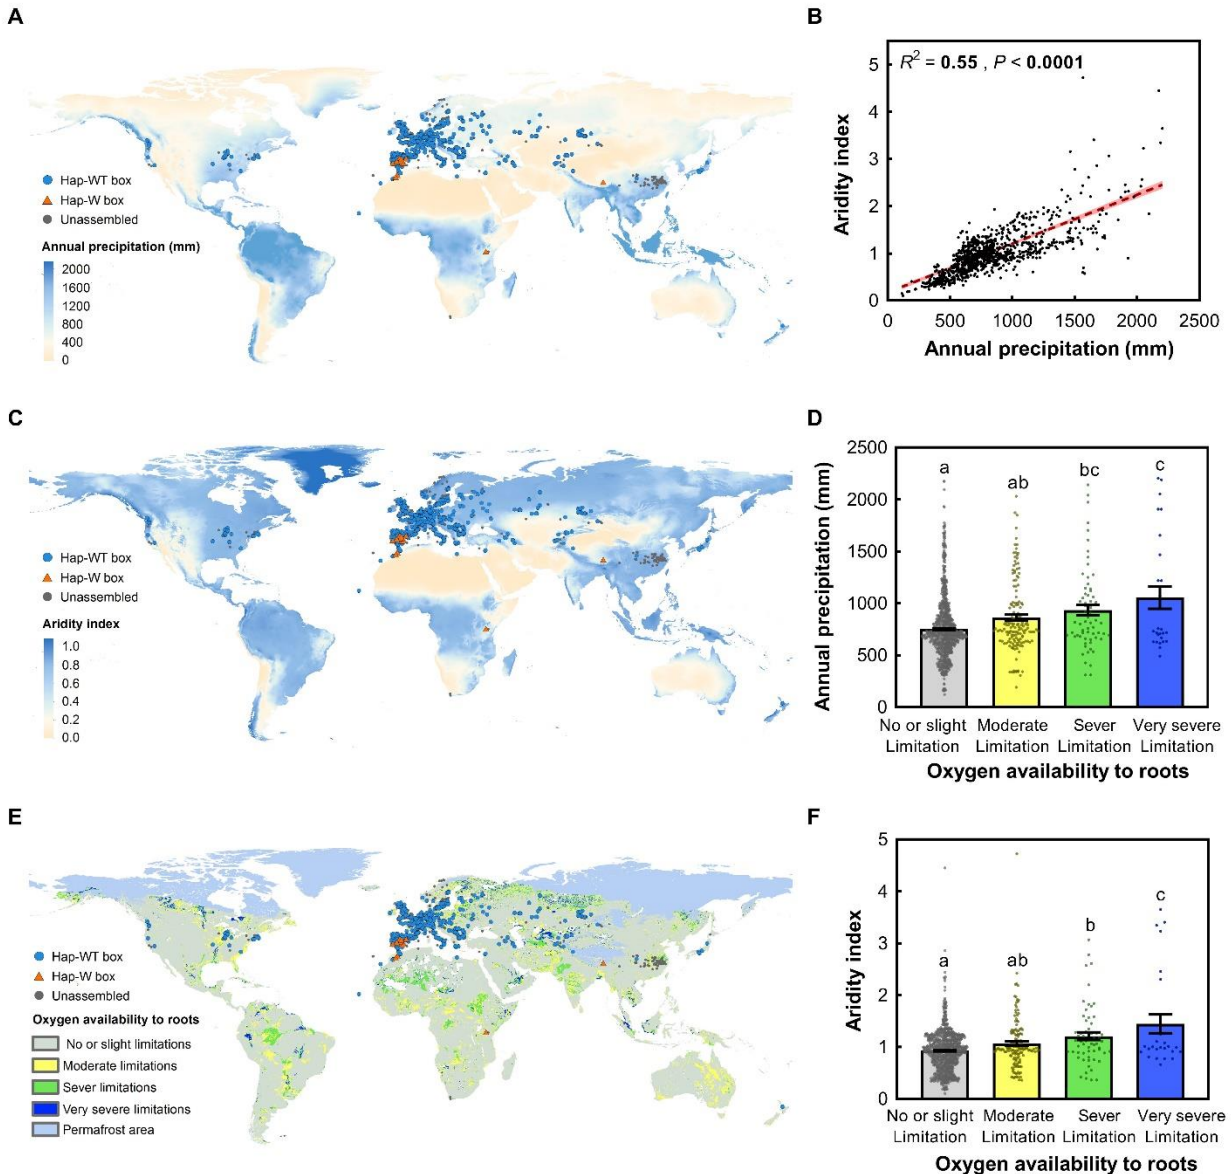

**Fig. S18. Aridity stress, oxygen availability to roots and precipitation were significantly associated in 1,475 global non-repetitive *A. thaliana* accessions. (A, C and E) Non-repetitive sites of 1,475 natural inbred lines of *A. thaliana* on annual precipitation (A), aridity index (C), and oxygen availability to roots (E) around the world. (B) Regression between annual precipitation and aridity index. The red dash line shows a linear fit, and the light red shadow indicates the 95% confidence interval of the regression. (D and F) Annual precipitation (D) and aridity index (F) in different classes of oxygen availability to roots. Different letters denote significant differences according to Tukey's HSD test ( $P < 0.05$ ).**

A

| Species                               | gene               | Genomic location             | Data source/ GenBank accession number               |
|---------------------------------------|--------------------|------------------------------|-----------------------------------------------------|
| <i>Arabidopsis thaliana</i> (Col)     | AT1G53910(RAP2.12) | 1:20134988-20135241          | http://plants.ensembl.org/Multi/Tools/Blast?db=core |
| <i>Arabidopsis thaliana</i> (Sichuan) | RAP2.12            | -254-0 from ATG              | sequence                                            |
| <i>Arabidopsis thaliana</i> (Tibet)   | RAP2.12            | -251-0 from ATG              | sequence                                            |
| <i>Arabidopsis lyrata</i>             | scaffold_105235.1  | 1:28877650-28877905          | http://plants.ensembl.org/Multi/Tools/Blast?db=core |
| <i>Arabidopsis halleri</i>            | g24906             | FJVB01000147.1:286768-287021 | http://plants.ensembl.org/Multi/Tools/Blast?db=core |
| <i>Arabidopsis arenosa</i>            | AaRAP2.12          | 1:22090461-22090724          | NCBI:PRJEB42625                                     |
| <i>Capsella rubella</i>               | CrRAP2.12          | 1:18963344-18963583          | https://phytozome.jgi.doe.gov                       |
| <i>Camelina sativa</i>                | Csa03g061220       | 3:27434238-27434507          | http://plants.ensembl.org/Multi/Tools/Blast?db=core |
| <i>Lepidium meyenii</i>               | LmRAP2.12          | scaffold216:4109567-4109829  | NCBI:SRP049292                                      |
| <i>Arabis alpina</i>                  | AALP_AA4G024200    | 4:2465754-2465978            | http://plants.ensembl.org/Multi/Tools/Blast?db=core |
| <i>Eutrema salsugineum</i>            | EUTSA_v10011606mg  | K1517809:796566-796832       | http://plants.ensembl.org/Multi/Tools/Blast?db=core |
| <i>Brassica oleracea</i>              | Bo3g184310         | C3:63832343-63832590         | http://plants.ensembl.org/Multi/Tools/Blast?db=core |
| <i>Brassica napus</i>                 | BnaA08g00990D      | LK031935:433910-434158       | http://plants.ensembl.org/Multi/Tools/Blast?db=core |
| <i>Brassica rapa</i>                  | Bra030919          | A08:784672-784920            | http://plants.ensembl.org/Multi/Tools/Blast?db=core |

B

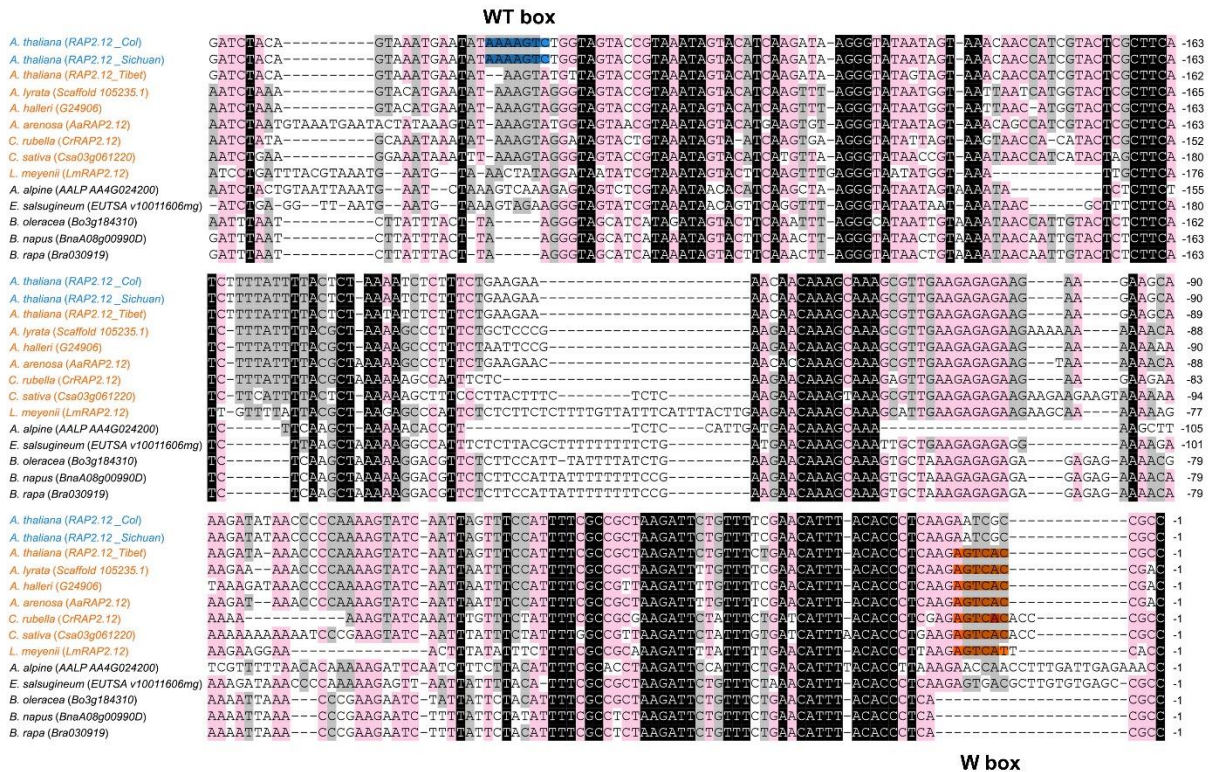

**Fig. S19. Sequences of RAP2.12 orthologous genes used for Phylogenetic tree among different Brassicaceae species. (A) About 250 bp promoter sequences from ATG were used for the phylogenetic tree. (B) Sequence details in the alignment. Core cis-element sequences of WT box and W box are in blue and orange respectively.**

**Table S1. Expression pattern of ERFVIIs in 32 global distributed *Arabidopsis* accessions.** Data are from the *Arabidopsis* eFP browser.

| Accession | CS_number | Latitude | Longitude | precipitation | AI     | RAP2.12_expression | RAP2.2_expression | RAP2.3_expression | HRE1_expression | HRE2_expression |
|-----------|-----------|----------|-----------|---------------|--------|--------------------|-------------------|-------------------|-----------------|-----------------|
| Ak-1      | CS6602    | 48.0683  | 7.62551   | 1075.213257   | 0.9184 | 199.85             | 154               | 38.65             | 17.75           | 1.8             |
| Bay-0     | CS954     | 49       | 11        | 780.4552612   | 1.0237 | 205.83             | 145.41            | 40.83             | 14.88           | 2.66            |
| Bla-5     | CS6620    | 41.6833  | 2.8       | 685.5853271   | 0.7693 | 171.55             | 160.44            | 39.1              | 22.45           | 3.3             |
| C24       | CS906     | 40.2077  | -8.42639  | 945.2876587   | 0.8301 | 242.98             | 144.35            | 57.96             | 18.93           | 4.33            |
| Can-0     | CS6660    | 29.2144  | -13.4811  | 161.5827179   | 0.1871 | 181.4              | 174.9             | 26.05             | 14.9            | 9.3             |
| Cen-0     | CS6661    | 49       | 0.5       | 733.2858276   | 0.9163 | 213.7              | 136.05            | 45.85             | 12              | 8.5             |
| CIBC-10   | CS22229   | 51.4083  | -0.6383   | 696.7718506   | 0.9722 | 261.5              | 169.25            | 38.9              | 9.75            | 1.8             |
| Col-0     | CS1092    | 38.3     | -92.3     | 1041.571289   | 0.8342 | 215.15             | 186.6             | 101.23            | 14.5            | 2.11            |
| Cvi-1     | CS8580    | 15.1111  | -23.6167  | 292.1398315   | 0.2911 | 227.76             | 117.75            | 39.69             | 20.11           | 6.68            |
| Dra-1     | CS6686    | 49.4167  | 16.2667   | 575.31604     | 0.8663 | 229.7              | 139.1             | 16.14             | 16.3            | 2.4             |
| En-T      | CS6176    | 39       | 71        | 601.2260742   | 1.4735 | 315.5              | 176.3             | 48.4              | 29.95           | 10.65           |
| Er-0      | CS6698    | 49.5955  | 11.0087   | 752.8178711   | 0.7937 | 191                | 123.9             | 27.35             | 13.95           | 12.5            |
| Est       | CS6173    | 58.6656  | 24.9871   | 716.2064209   | 1.2467 | 199.9              | 149.36            | 55.95             | 22.01           | 9.31            |
| GOT-1     | CS22277   | 51.5338  | 9.9355    | 653.7061768   | 0.8761 | 195.45             | 106.05            | 29.35             | 16.89           | 1.7             |
| HR-5      | CS22205   | 51.4083  | -0.6383   | 696.7718506   | 0.9722 | 280.8              | 140.25            | 35.5              | 17.7            | 2.4             |
| Is-0      | CS6741    | 50.5     | 7.5       | 820.2348022   | 1.0178 | 262.2              | 149.69            | 2.95              | 26.25           | 3               |
| Kin-0     | CS6755    | 44.46    | -85.37    | 799.9605103   | 0.8719 | 240.68             | 157.6             | 15.35             | 12.78           | 4.81            |
| Ler-2     | CS8581    | 47.984   | 10.8719   | 1014.838318   | 1.2847 | 267.83             | 160.54            | 19.56             | 15.18           | 6               |
| Li-2:1    | CS6772    | 50.3833  | 8.0666    | 648.7250366   | 0.8261 | 230.85             | 127.2             | 31.2              | 15.65           | 2.35            |
| M7323S    | CS6184    | 59.3324  | 18.0656   | 569.8093262   | 0.9179 | 202.75             | 110.8             | 32.5              | 8.15            | 3               |
| Ms-0      | CS6797    | 55.7522  | 37.6322   | 706.6424561   | 1.0643 | 203.35             | 137.3             | 28.15             | 20.1            | 10.85           |
| Nd-1      | CS1636    | 50       | 10        | 634.1703491   | 0.7944 | 217.03             | 204.56            | 47.85             | 12.05           | 8.58            |
| NFE-1     | CS22163   | 51.4083  | -0.6383   | 696.7718506   | 0.9722 | 129.6              | 148.94            | 30.65             | 24.5            | 6.55            |
| Nok-1     | CS6808    | 52.24    | 4.45      | 825.0281982   | 1.2845 | 254.05             | 105.65            | 57.95             | 9.15            | 2.45            |
| Nw-1      | CS6812    | 50.5     | 8.5       | 747.0148926   | 0.9892 | 218.25             | 126.7             | 10.4              | 20.39           | 4.5             |
| Ove-0     | CS6823    | 53.3422  | 8.42255   | 737.317749    | 1.1158 | 176                | 195               | 63.6              | 17.1            | 6.8             |
| Se-0      | CS6852    | 38.3333  | -3.53333  | 416.2077942   | 0.3988 | 182.25             | 131.05            | 26.3              | 15.65           | 2.04            |
| Sf-2      | CS6857    | 41.7833  | 3.03333   | 605.6061401   | 0.6997 | 204.95             | 149.9             | 38.5              | 19.1            | 9.25            |
| Sha       | CS929     | 37.29    | 71.3      | 655.486145    | 1.6468 | 235.05             | 141.43            | 19.23             | 12.63           | 4.43            |
| Ta-0      | CS6867    | 49.5     | 14.5      | 660.043335    | 0.8992 | 261                | 135.05            | 3.25              | 14.25           | 2.75            |
| Uk-3      | CS6880    | 48.0333  | 7.7667    | 884.7943115   | 0.9686 | 214.45             | 202.1             | 20.05             | 22.35           | 4.09            |
| Van-0     | CS6884    | 49.2655  | -123.206  | 1535.476807   | 1.7035 | 235.68             | 151.54            | 15.36             | 17.21           | 2.56            |

**Table S4. List of Primer Sequences Used in the Study.****Primers for linkage mapping, the intervals of single nucleotide polymorphism (SNP) markers are shown in brackets**

| Primer name             | Forward primer sequence  | Reverse primer sequence  |
|-------------------------|--------------------------|--------------------------|
| POLY1.(22791833-792483) | TGGAGAGAATCGGCTTCGTT     | CCACAATGCAGAGATTACTCGG   |
| POLY1.(22792686-793619) | GAGTCCTGCTCAAATCGTAGC    | TATCTGGCCTTCCTCTGT       |
| POLY1.(22793680-794561) | TCGATTACGCCGTGGCCTAT     | CACTACACTGCAATAATTGC     |
| POLY1.(22794634-796015) | GCATGAGAAACGTGATAGAA     | CAAAATCCCAAATCTCCTCTG    |
| POLY1.(22796666-797636) | GTGACAGGGACATAGACACTC    | GGGCCGAGACCACGAACCTGC    |
| POLY1.(22798005-798587) | AGGAACTTGTACAATCCTGG     | GCAGGACACGTACGATATTATTG  |
| POLY1.(22798815-799697) | TGGCTACTCCTGAATGCAAAC    | GGTATCTATGAACAGAGCT      |
| POLY1.(22799774-800718) | GAGTGATGAGACTTGATTTGTGTG | TGATAAACGAACGATGCGGGAA   |
| POLY1.(22800795-801368) | GTCTCTCAGGAGTTCCTGTT     | TAAAGAAGCAGAAGCTGTCCAG   |
| POLY1.(22801829-802528) | AGGAGAACTATCTCCTCCTCA    | CTCAAAACCCACTTCCATATGCAA |
| POLY1.(22802532-803530) | TGACCCGATTATTGTGGCT      | AGCTGAATACTCCTCTCCAC     |
| POLY1.(22803593-804615) | TGGGATCACTTCATCTCA       | AACTCGAAGATGGTCTCACTT    |
| POLY1.(22804616-805596) | GGTCCACCGGGATGCCTTGTT    | AGACAAGATAGAACCTCTTCC    |
| POLY1.(22805806-806902) | AGTCACCTGGTTTCATCTCTGTG  | ACGAACTATGTTACAAGAGGG    |
| POLY1.(22806971-807804) | TGCACGTACGCAATGACCAC     | TCCGACTAAAGCTCCGGCAC     |
| POLY1.(22807806-808654) | CCTTTCCCGGAATGGTAAT      | TTCCACAACATGCCATTTTCCC   |

**Primers for T-DNA insertion identification**

| Primer name      | Forward primer sequence | Reverse primer sequence   | Germplasm Name         | Reference |
|------------------|-------------------------|---------------------------|------------------------|-----------|
| wrky70-LP        | TGATCTTCGGAATCCATGAAG   | CAAACCACACCAAGAGGAAAAG    | wrky70(SALK_025198)    | (34)      |
| LBb1.3-BP(T-DNA) |                         | ATTTTGCCGATTTCGGAAC       |                        |           |
| rap2.12-LP       | TCTTCGATTTTGACGCTGAGT   | AGGGTTTGACCAATTGTCCTGAG   | rap2.12(SAIL_1215_H10) | (21)      |
| LB3-BP(T-DNA)    |                         | GAATTCATAACCAATCTCGATACAC |                        |           |

**Primers for qRT-PCR**

| Primer name | Forward primer sequence      | Reverse primer sequence    | Purpose                     |
|-------------|------------------------------|----------------------------|-----------------------------|
| ACTIN2-RT   | GAACCAGAAGGATGCATATGTTGGTG   | GCTCATTGTAGAAAGTGTGATGCCAG | Internal standard           |
| GLIP5-RT    | GCCGTTAATTCGCGGTTTTTG        | GAACCTTGAACGTTTCCACA       | qRT-PCR for gene expression |
| RAP2.12-RT  | TGCTGGATGTAATGGGTATCAG       | CAGAAGAGATGTCGGGAGTTATC    | qRT-PCR for gene expression |
| RAP2.2-RT   | CATGGAAGAGAAGCCTCAGATG       | GCCCTGATCGGAACTGAAATA      | qRT-PCR for gene expression |
| RAP2.3-RT   | CCATCCACCAACCAAGTTA          | ATTCTTCTCTTCTCCTCCGTTTC    | qRT-PCR for gene expression |
| HRE1-RT     | ACGAATCTCTGGAAAAGAGGA        | TCCGGATTATTCTCTCCACACA     | qRT-PCR for gene expression |
| HRE2-RT     | GAAGAAGCCGATACTAAACCAGG      | CTCATGTAATCCTCCAATGCC      | qRT-PCR for gene expression |
| WRKY70-RT   | GAGATCGGAGACGTGTACTATAGAGTCG | GCACCTTGGGTATACTTGTGTGTG   | qRT-PCR for gene expression |
| ADH1-RT     | TATTCGATGCAAAGCTGCTGTG       | CGAACTTCGTGTTTCTGCGGT      | qRT-PCR for gene expression |
| PDC1-RT     | CGATTATGGCACTAACCAGGATT      | TGTTACCACCGCCTGATAAC       | qRT-PCR for gene expression |
| SUS4-RT     | CGCAGAACGTGTAATAACGCG        | CAACCTTGAGAGCAAAGCAAA      | qRT-PCR for gene expression |
| PCO1-RT     | ATTGGGTGTTGATGCTCCAATG       | ATGCATGTTCCCGCCATCTTCC     | qRT-PCR for gene expression |



**Plasmid construction for luciferase activity assay and production of transgenic *Arabidopsis***

| Primer name                | sequence                                             | Purpose                                                               | Vector            |
|----------------------------|------------------------------------------------------|-----------------------------------------------------------------------|-------------------|
| RAP2.12cds-KpnI-F          | acgaacgatagccatGGTACCCatgtgtggaggagctataatccgat      | p35S:RAP2.12-Col<br>p35S:RAP2.12-Sic<br>p35S:RAP2.12 <sup>Tibet</sup> | pCAMBIA1300       |
| RAP2.12cds-XbaI-R          | gcgctcagttggaatTCTAGATcagaagactcctccaatcatggaatgaatt |                                                                       |                   |
| pPGB1-HindIII-F            | gtcgacggtatcgatAAGCTTcctcttagatgaaagccaca            | pPGB1:LUC                                                             | pGreenII-0800-LUC |
| pPGB1-BamHI-R              | cgctctagaactagtGGATCCaatatttcacaacctctaatgat         |                                                                       |                   |
| WRKY70cds-KpnI-F           | acgaacgatagccatGGTACCCatggataactaataaaagcaaaa        | p35S:WRKY70-Col<br>p35S:WRKY70-Sic<br>p35S:WRKY70 <sup>Tibet</sup>    | pCAMBIA1300       |
| WRKY70cds-XbaI-R           | gcgctcagttggaatTCTAGATcaagatagatcgcaacatgaactga      |                                                                       |                   |
| pRAP2.12-HindIII(Sic)-F    | gtcgacggtatcgatAAGCTTgcgattcggcccaaaaagaca           | pSic-RAP2.12:LUC                                                      | pGreenII-0800-LUC |
| pRAP2.12-BamHI(Sic)-R      | cgctctagaactagtGGATCCgcgggcgactcttgagggtgt           |                                                                       |                   |
| pRAP2.12-HindIII(Sic)-F    | gtcgacggtatcgatAAGCTTgcgattcggcccaaaaagaca           | pSic-RAP2.12(W <sub>T</sub> <sub>M</sub> ):LUC                        | pGreenII-0800-LUC |
| pRAP2.12-WTm-R             | tttactgtagatctattttaaattagg                          |                                                                       |                   |
| pRAP2.12-WTm-F             | tagatctacagtaaatgaatataaagfatgtagtagaccg             |                                                                       |                   |
| pRAP2.12-BamHI(Sic)-R      | cgctctagaactagtGGATCCgcgggcgactcttgagggtgt           |                                                                       |                   |
| pRAP2.12-HindIII(Sic)-F    | gtcgacggtatcgatAAGCTTgcgattcggcccaaaaagaca           | pSic-RAP2.12(W <sub>T</sub> <sub>M+W</sub> ):LUC                      | pGreenII-0800-LUC |
| pRAP2.12-WTm-R             | tttactgtagatctattttaaattagg                          |                                                                       |                   |
| pRAP2.12-WTm-F             | tagatctacagtaaatgaatataaagfatgtagtagaccg             |                                                                       |                   |
| pRAP2.12-BamHI(Tib)-R      | cgctctagaactagtGGATCCgcgggcgactcttgagggtgt           |                                                                       |                   |
| pRAP2.12-HindIII(Tib)-F    | gtcgacggtatcgatAAGCTTgcgattcggcccaaaaagaca           | pTib-RAP2.12:LUC                                                      | pGreenII-0800-LUC |
| pRAP2.12-BamHI(Tib)-R      | cgctctagaactagtGGATCCgcgggcgactcttgagggtgt           |                                                                       |                   |
| pRAP2.12-HindIII(Tib)-F    | gtcgacggtatcgatAAGCTTgcgattcggcccaaaaagaca           | pTib-RAP2.12(W <sub>M</sub> ):LUC                                     | pGreenII-0800-LUC |
| pRAP2.12-BamHI(Sic)-R      | cgctctagaactagtGGATCCgcgggcgactcttgagggtgt           |                                                                       |                   |
| pRAP2.12-XcmI(Sic)-F       | gactctagaggatccCCAATACTTGTATGGgcgattcggcccaaaaagaca  | pSic-RAP2.12:RAP2.12-GUS                                              | pCXGUS-P          |
| pRAP2.12-RAP2.12cds(Sic)-R | agctctccacacatggcggtgactcttgagggtgt                  |                                                                       |                   |
| RAP2.12cds-F               | atgtgtggaggagctataatccgat                            |                                                                       |                   |
| RAP2.12cds-XcmI-R          | acgtaacatggatccCCAATACTTGTATGGggaagactcctccaatcatgg  | pTib-RAP2.12:RAP2.12-GUS                                              | pCXGUS-P          |
| pRAP2.12-XcmI(Tib)-F       | gactctagaggatccCCAATACTTGTATGGgcgattcggcccaaaaagaca  |                                                                       |                   |
| pRAP2.12-RAP2.12cds(Tib)-R | agctctccacacatggcggtgactcttgagggtgt                  |                                                                       |                   |
| RAP2.12cds-F               | atgtgtggaggagctataatccgat                            | pSic-RAP2.12:GUS                                                      | pCXGUS-P          |
| RAP2.12cds-XcmI-R          | acgtaacatggatccCCAATACTTGTATGGgcgggcgactcttgagggtgt  |                                                                       |                   |
| pRAP2.12-XcmI(Sic)-F       | gactctagaggatccCCAATACTTGTATGGgcgattcggcccaaaaagaca  | pTib-RAP2.12:GUS                                                      | pCXGUS-P          |
| pRAP2.12-XcmI(Tib)-R       | acgtaacatggatccCCAATACTTGTATGGgcgggcgactcttgagggtgt  |                                                                       |                   |
| pRAP2.12-XcmI(Sic)-F       | gactctagaggatccCCAATACTTGTATGGgcgattcggcccaaaaagaca  | pSic-Tib <sub>(-125-0)</sub> <sup>r</sup> -RAP2.12:GUS                | pCXGUS-P          |
| pRAP2.12(-125)-R           | ctttctctcttcaacgctttgc                               |                                                                       |                   |
| pRAP2.12(-125)-F           | gcaaagcgttgaagagagaagaag                             |                                                                       |                   |
| pRAP2.12-XcmI(Tib)-R       | acgtaacatggatccCCAATACTTGTATGGgcgggcgactcttgagggtgt  | pSic-Tib <sub>(-250-0)</sub> <sup>r</sup> -RAP2.12:GUS                | pCXGUS-P          |
| pRAP2.12-XcmI(Sic)-F       | gactctagaggatccCCAATACTTGTATGGgcgattcggcccaaaaagaca  |                                                                       |                   |
| pRAP2.12(-250)-R           | ttatattcattactgtagatctat                             | pSic-Tib <sub>(-250-0)</sub> <sup>r</sup> -RAP2.12:GUS                | pCXGUS-P          |
| pRAP2.12(-250)-F           | atagatctacagtaaatgaatataa                            |                                                                       |                   |

|                      |                                                      |                                               |          |
|----------------------|------------------------------------------------------|-----------------------------------------------|----------|
| pRAP2.12-Xcml(Tib)-R | acgtaacatggatccCCAATACTTGTATGGggcgggtgactcttgagggtgt |                                               |          |
| pRAP2.12-Xcml(Sic)-F | gactctagaggatccCCAATACTTGTATGGgcgattcgcccaaaaagaca   | pSic-Tib <sub>(-500-0)</sub> -<br>RAP2.12:GUS | pCXGUS-P |
| pRAP2.12(-500)-R     | tgcattcaggagtagccaacgcag                             |                                               |          |
| pRAP2.12(-500)-F     | ctgcgttggtactcctgaatgca                              |                                               |          |
| pRAP2.12-Xcml(Tib)-R | acgtaacatggatccCCAATACTTGTATGGggcgggtgactcttgagggtgt |                                               |          |

#### Oligonucleotides and plasmid construction for EMSA

| Primer name                            | sequence                                           | Purpose                                                 | Vector   |
|----------------------------------------|----------------------------------------------------|---------------------------------------------------------|----------|
| pRAP2.12-WT-F from Sichuan with biotin | Biotin-TAAATGAATATAAAAAGTCTGGTAGTACCGT             | Probe with Biotin for EMSA                              | -        |
| pRAP2.12-WT-R from Sichuan with biotin | Biotin-ACGGTACTACCAGACTTTTATATTCATTTA              | Probe with Biotin for EMSA                              | -        |
| pRAP2.12-WT-F from Sichuan             | TAAATGAATATAAAAAGTCTGGTAGTACCGT                    | Probe without Biotin for EMSA                           | -        |
| pRAP2.12-WT-R from Sichuan             | ACGGTACTACCAGACTTTTATATTCATTTA                     | Probe without Biotin for EMSA                           | -        |
| pRAP2.12-WTm-F from Tibet              | TAAATGAATATAAAGTATGTTAGTACCGTAA                    | Probe without Biotin for EMSA                           | -        |
| pRAP2.12-WTm-R from Tibet              | TTACGGTACTAACATACTTATATTCATTTA                     | Probe without Biotin for EMSA                           | -        |
| pRAP2.12-W-F from Tibet with biotin    | Biotin-TACACCCTCAAGAGTCACCGCCATGTGTGG              | Probe with Biotin for EMSA                              | -        |
| pRAP2.12-W-R from Tibet with biotin    | Biotin-CCACACATGGCGGTGACTCTTGAGGGTGTA              | Probe with Biotin for EMSA                              | -        |
| pRAP2.12-W-F from Tibet                | TACACCCTCAAGAGTCACCGCCATGTGTGG                     | Probe without Biotin for EMSA                           | -        |
| pRAP2.12-W-R from Tibet                | CCACACATGGCGGTGACTCTTGAGGGTGTA                     | Probe without Biotin for EMSA                           | -        |
| pRAP2.12-Wm-F from Sichuan             | TACACCCTCAAGAATCGCCGCCATGTGTGG                     | Probe without Biotin for EMSA                           | -        |
| pRAP2.12-Wm-R from Sichuan             | CCACACATGGCGGCGATTCTTGAGGGTGTA                     | Probe without Biotin for EMSA                           | -        |
| WRKY70cds-BamHI-F                      | gatctggtccgcgtGATCCatggataactataaaagcaaaaagcttaaag | Prokaryotic expression of GST-WRKY70-Sic/GST-WRKY70-Tib | pGEX4T-1 |
| WRKY70cds-EcoRI-R                      | ctcgagtcgacccggGAATTCaagatagattcgaactgaactgaagatag | Prokaryotic expression of GST-WRKY70-Sic/GST-WRKY70-Tib | pGEX4T-1 |

**Table S2. World-wide *RAP2.12* promoter sequence classification in *Arabidopsis* used in haplotype network analysis, related to figure 4, B and C.**

**Table S3. Annual precipitation, aridity index, and oxygen availability to roots in 1475 non-repetitive *Arabidopsis* accessions around the world.**

**Data S1. (separate file)**

**Fasta format sequence of *RAP2.12* promoter used in haplotype network analysis, related to figure 4B.**
